# Supplementary material
Source: PubMed Central journal article supplement (PMC11625410)
Supplement: NIHMS1922292-supplement-1.pdf [file NIHMS1922292-supplement-1.pdf]

1  
2  
3  
4  
5  
6  
7  
8  
9  
10  
11  
12  
13  
14  
15  
16  
17  
18  
19  
20  
21  
22  
23  
24  
25  
26  
27  
28  
29  
30  
31  
32  
33  
34  
35  
36  
37  
38  
39  
40  
41  
42  
43  
44  
45

# Supplementary Materials for

## Molecular de-extinction of ancient antimicrobial peptides enabled by machine learning

Jacqueline R. M. A. Maasch, Marcelo D. T. Torres, Marcelo C. R. Melo, Cesar de la Fuente-  
Nunez

Correspondence to: cfuente@upenn.edu

**This PDF file includes:**

- Figs. S1 to S3
- Tables S1 to S5

46 **Supplementary Tables and Figures:**

47

48 *Supplementary Tables*

49

50 **Table S1 related to Fig. 2. panCleave accuracy on proteases with at least 100 test set**  
 51 **observations and on protease families and clans with at least 50 test set observations.** Protease  
 52 family and clan IDs are those reported in MEROPS[S1]. Total test set observations (*Total*) and  
 53 total predictions with predicted labels that are concordant with true labels (*Concordant*) are noted.  
 54 Mean probability refers to the predicted probability of class assignment averaged over all  
 55 observations, as returned by the panCleave random forest (RF) model. Table is ordered by  
 56 descending test set accuracy in each case.

| Protease MEROPS ID | Protease name              | Concordant | Total | Mean probability | Accuracy   |
|--------------------|----------------------------|------------|-------|------------------|------------|
| C14.003            | Caspase-3                  | 117        | 118   | 0.8266           | 0.9915     |
| C14.005            | Caspase-6                  | 217        | 220   | 0.8635           | 0.9864     |
| S01.010            | Granzyme B                 | 300        | 322   | 0.7647           | 0.9317     |
| C13.004            | Legumain                   | 387        | 427   | 0.6714           | 0.9063     |
| C01.034            | Cathepsin S                | 471        | 575   | 0.6403           | 0.8191     |
| C01.009            | Cathepsin V                | 235        | 300   | 0.6362           | 0.7833     |
| C01.036            | Cathepsin K                | 313        | 410   | 0.6353           | 0.7634     |
| M10.003            | Matrix metalloproteinase-2 | 353        | 471   | 0.6363           | 0.7495     |
| C01.032            | Cathepsin L                | 406        | 543   | 0.6336           | 0.7477     |
| C01.060            | Cathepsin B                | 75         | 101   | 0.6480           | 0.7426     |
| M10.005            | Matrix metalloproteinase-3 | 337        | 454   | 0.6264           | 0.7423     |
| A01.010            | Cathepsin E                | 188        | 275   | 0.6101           | 0.6836     |
| A01.009            | Cathepsin D                | 86         | 134   | 0.6180           | 0.6418     |
| S01.139            | Granzyme M                 | 86         | 136   | 0.6031           | 0.6324     |
| M12.004            | Meprin beta subunit        | 108        | 183   | 0.6254           | 0.5902     |
| M12.002            | Meprin alpha subunit       | 91         | 168   | 0.6232           | 0.5417     |
|                    | <b>Protease family</b>     |            |       |                  |            |
| -                  | C14                        | 411        | 422   | 0.82512289       | 0.97393365 |
| -                  | C13                        | 388        | 429   | 0.6712052        | 0.9044289  |
| -                  | S8                         | 62         | 70    | 0.66046515       | 0.88571429 |
| -                  | C1                         | 1026       | 1360  | 0.63477728       | 0.75441176 |
| -                  | M10                        | 728        | 1008  | 0.63091031       | 0.72222222 |
| -                  | S1                         | 616        | 872   | 0.67541674       | 0.70642202 |
| -                  | A1                         | 270        | 433   | 0.61190775       | 0.62355658 |
| -                  | C2                         | 56         | 98    | 0.63135532       | 0.57142857 |
| -                  | M12                        | 179        | 328   | 0.62257116       | 0.54573171 |
| -                  | S26                        | 34         | 69    | 0.59704888       | 0.49275362 |
| -                  | T1                         | 17         | 51    | 0.64760432       | 0.33333333 |
|                    | <b>Protease clan</b>       |            |       |                  |            |
| -                  | CD                         | 785        | 836   | 0.7465014        | 0.93899522 |
| -                  | SB                         | 62         | 70    | 0.66046515       | 0.88571429 |
| -                  | CA                         | 1081       | 1459  | 0.63442325       | 0.74091844 |
| -                  | PA                         | 616        | 872   | 0.67541674       | 0.70642202 |
| -                  | MA                         | 910        | 1346  | 0.62844619       | 0.67607727 |
| -                  | AA                         | 270        | 433   | 0.61190775       | 0.62355658 |
| -                  | SF                         | 34         | 69    | 0.59704888       | 0.49275362 |
| -                  | PB                         | 18         | 52    | 0.65295276       | 0.34615385 |

57

58 **Table S2 related to Fig. 2. Protease-specific accuracy of panCleave as compared to published cleavage site models.** The following  
59 table is adapted from Table S6 in[S2]. Reported panCleave values are test set accuracy. Best accuracy per protease is represented in  
60 bold type. Note that all comparisons are relative, with accuracies as reported in[S2]; direct comparisons were not possible, as training  
61 and testing data were not released for prior models. Models are Cascleave[S3], CAT3[S4], CleavPredict[S5], ScreenCap3[S6],  
62 SitePrediction[S7], PROSPERous[S8], and DeepCleave[S2]. Results for DeepCleave are reported with and without transfer learning  
63 (TL), as reported in the original publication.

| Protease name              | MEROPS ID | panCleave     | Cascleave | CAT3   | CleavPredict | ScreenCap3 | SitePrediction | PROSPERous    | DeepCleave (without TL) | DeepCleave (with TL) |
|----------------------------|-----------|---------------|-----------|--------|--------------|------------|----------------|---------------|-------------------------|----------------------|
| Caspase-1                  | C14.001   | <b>0.9268</b> | 0.5119    | 0.6786 | -            | 0.7368     | 0.8571         | 0.8750        | 0.8315                  | 0.9205               |
| Caspase-3                  | C14.003   | <b>0.9915</b> | 0.5920    | 0.7731 | -            | 0.8741     | 0.9275         | 0.9656        | 0.9759                  | 0.9856               |
| Caspase-7                  | C14.004   | 0.9524        | 0.6143    | 0.8378 | -            | 0.8684     | 0.9605         | 0.9359        | 0.9625                  | <b>0.9744</b>        |
| Caspase-6                  | C14.005   | 0.9864        | 0.5286    | 0.6583 | -            | 0.7802     | 0.8767         | 0.9850        | <b>0.9935</b>           | 0.9901               |
| Caspase-2                  | C14.006   | <b>1.0000</b> | 0.5519    | 0.7632 | -            | 0.8333     | -              | -             | 0.9878                  | 0.9880               |
| Matrix metallopeptidase-8  | M10.002   | 0.6667        | -         | -      | 0.7273       | -          | <b>0.8750</b>  | 0.8250        | 0.6250                  | 0.7879               |
| Matrix metallopeptidase-2  | M10.003   | 0.7495        | -         | -      | 0.6032       | -          | 0.7133         | 0.8736        | -                       | <b>0.8899</b>        |
| Matrix metallopeptidase-9  | M10.004   | 0.6613        | -         | -      | 0.6081       | -          | 0.8378         | 0.8077        | 0.5734                  | <b>0.8613</b>        |
| Matrix metallopeptidase-3  | M10.005   | 0.7423        | -         | -      | 0.7273       | -          | 0.8571         | <b>0.8810</b> | 0.7027                  | 0.8780               |
| Matrix metallopeptidase-7  | M10.008   | 0.7805        | -         | -      | -            | -          | 0.7375         | 0.8523        | 0.6264                  | <b>0.9318</b>        |
| Matrix metallopeptidase-12 | M10.009   | 0.7143        | -         | -      | -            | -          | 0.6786         | 0.8378        | 0.6316                  | <b>0.9079</b>        |
| Matrix metallopeptidase-1  | M10.014   | 0.4815        | -         | -      | -            | -          | -              | 0.8125        | 0.6275                  | <b>0.8519</b>        |

65

66 **Table S3 related to Fig. 3. Antimicrobial and cytotoxic activities of modern and archaic secreted protein fragments.** Minimum  
67 inhibitory concentration (MIC) values ( $\mu\text{mol L}^{-1}$ ) for peptides screened against pathogenic strains (dash indicates no activity) in BM2  
68 with glucose (B) and LB (L) media. Curation methods are machine learning model consensus vote (ML), random selection (RS), and  
69 human expert (HE). Predicted label (Pred. label) indicates predicted antimicrobial activity (1), no predicted activity (0), or no prediction  
70 (NA). Peptides were classified as archaic encrypted peptides (AEPs) and modern encrypted peptides (MEPs). The hemolytic and  
71 cytotoxic activities are expressed in terms of  $\text{HC}_{50}$  and  $\text{CC}_{50}$  values ( $\mu\text{mol L}^{-1}$ ), respectively. The values were estimated by non-linear  
72 regressions based on the screen of peptides in a gradient of concentrations and represent the hemolytic and the cytotoxic concentration  
73 values needed to lyse and kill 50% of the cells present in the experiment. The experiments were done in three independent biological  
74 replicates, and for the cytotoxic activity assays, two technical replicates were performed within each biological replicate.  
75

| ID           | Classification | Fragment sequence                                              | Length | Curation method | Pred. label | Antimicrobial activity, MIC ( $\mu\text{mol L}^{-1}$ ) |   |      |    |                  |    |                  |    |           |    |           |   |      |   | Hemolytic Activity vs RBCs ( $\text{HC}_{50}$ , $\mu\text{mol L}^{-1}$ ) | Cytotoxic Activity vs HEK293T cells ( $\text{CC}_{50}$ , $\mu\text{mol L}^{-1}$ ) |
|--------------|----------------|----------------------------------------------------------------|--------|-----------------|-------------|--------------------------------------------------------|---|------|----|------------------|----|------------------|----|-----------|----|-----------|---|------|---|--------------------------------------------------------------------------|-----------------------------------------------------------------------------------|
|              |                |                                                                |        |                 |             | PA01                                                   |   | PA14 |    | <i>Ec</i> AIC221 |    | <i>Ec</i> AIC222 |    | <i>Ab</i> |    | <i>Sa</i> |   | MRSA |   |                                                                          |                                                                                   |
|              |                |                                                                |        |                 |             | B                                                      | L | B    | L  | B                | L  | B                | L  | B         | L  | B         | L | B    | L |                                                                          |                                                                                   |
| CBPZ-GSK24   | MEP            | GSKPWWW<br>SYFTSLSTH<br>RPRWLLKY                               | 24     | ML              | 1           | 8                                                      | - | 4    | -  | 4                | -  | 2                | -  | -         | 16 | -         | - | -    | - | 19.42                                                                    | 44.19                                                                             |
| XDH-AVA32    | MEP            | AVAKLPAQ<br>KTEVFRGV<br>LEQLRWFA<br>GKQVKSV<br>A               | 32     | ML              | 1           | -                                                      | - | -    | -  | 32               | -  | 32               | -  | -         | -  | -         | - | -    | - | -                                                                        | -                                                                                 |
| LYSC-AVA39   | MEP            | AVACAKR<br>VVRDPQGI<br>RAWVAWR<br>N<br>RCQNRDVR<br>QYVQCG<br>V | 39     | ML              | 1           | -                                                      | - | 128  | -  | 128              | -  | 128              | -  | -         | -  | -         | - | -    | - | >128                                                                     | >128                                                                              |
| ISK5-GKI32   | MEP            | GKIHGNTC<br>SMCEAFFQ<br>QEAKEKER<br>AEPRAKVK                   | 32     | RS              | NA          | -                                                      | - | -    | -  | 128              | -  | 128              | -  | -         | -  | -         | - | -    | - | >128                                                                     | >128                                                                              |
| CALR-GWT20   | MEP            | GWTSRWIE<br>SKHKSDFG<br>KFVL                                   | 20     | HE              | 1           | -                                                      | - | -    | -  | -                | -  | 128              | -  | -         | 64 | -         | - | -    | - | >128                                                                     | 19.28                                                                             |
| CO7A1-AIG15  | MEP            | AIGPKGDR<br>GFPGLG                                             | 15     | CD              | 1           | -                                                      | - | -    | 32 | -                | -  | -                | -  | -         | -  | -         | - | -    | - | >128                                                                     | >128                                                                              |
| TKN1-SSI27   | MEP            | SSIEKQVAL<br>LKALYGHG<br>QISHKRHK<br>TD                        | 27     | CD              | 1           | -                                                      | - | -    | -  | -                | -  | -                | -  | -         | 64 | -         | - | -    | - | >128                                                                     | 40.27                                                                             |
| A7E2T1-SPR29 | MEP            | SPRYHTVG<br>RAAGLLM                                            | 29     | CD              | 1           | -                                                      | - | -    | -  | -                | 64 | -                | 64 | -         | 8  | -         | - | -    | - | 112                                                                      | 12.78                                                                             |

|                      |     |                                                        |    |   |   |    |     |    |   |     |     |   |   |   |     |   |     |   |     |   |       |      |
|----------------------|-----|--------------------------------------------------------|----|---|---|----|-----|----|---|-----|-----|---|---|---|-----|---|-----|---|-----|---|-------|------|
|                      |     | GLRRSPYL<br>WRRALR                                     |    |   |   |    |     |    |   |     |     |   |   |   |     |   |     |   |     |   |       |      |
| PDB6I34D-<br>ALQ29   | AEP | ALQLCYRH<br>NKRRKFFV<br>DPRCHPQTI<br>AVVQ              | 29 | - | - | 64 | -   | 32 | - | 128 | 128 | - | - | - | -   | - | -   | - | -   | - | >128  | >128 |
| A0A384E0<br>N4-DLI09 | AEP | DLIERIQAD                                              | 9  | - | - | -  | -   | -  | - | -   | -   | - | - | - | 128 | - | 128 | - | 128 | - | >128  | >128 |
| A0A343EQ<br>H4-LAM11 | AEP | LAMVIPLW<br>AGA                                        | 11 | - | - | -  | -   | -  | - | -   | -   | - | - | - | 128 | - | -   | - | -   | - | >128  | >128 |
| A0A343AZ<br>S4-FMA25 | AEP | FMAEYTNII<br>MMNLTLLL<br>IFLGTTYN                      | 25 | - | - | -  | -   | -  | - | -   | -   | - | - | - | 128 | - | -   | - | -   | - | -     | -    |
| A0A343EQ<br>H0-NVK38 | AEP | NVKMKWQ<br>FEHTKPTPF<br>LPTLITLTT<br>LLLPISPFM<br>LMIL | 38 | - | - | -  | 128 | -  | - | -   | -   | - | - | - | -   | - | -   | - | -   | - | 54.72 | >128 |
| A0A0S2IB0<br>2-AYT38 | AEP | AYTTWNIL<br>SSAGSFISL<br>TAVMLMIF<br>MIWEAFAS<br>KRKVL | 38 | - | - | -  | 128 | -  | - | -   | -   | - | - | - | -   | - | -   | - | -   | - | 88.11 | >128 |

76 PA01: *P. aeruginosa* PA01; PA14: *P. aeruginosa* PA14; Ec AIC221: *E. coli* AIC221; Ec AIC222: *E. coli* AIC222; Ab: *A. baumannii*  
77 ATCC19606; Sa: *S. aureus* ATCC12600; MRSA: methicillin-resistant *S. aureus* ATCC BAA-1556.

78  
79

80 **Table S4 related to Fig. 2. Physicochemical properties of archaic and modern encrypted peptides, and previously described**  
81 **encrypted and antimicrobial peptides.** Medians are reported with standard deviations in parentheses. Physicochemical properties were  
82 calculated using the DBAASP[S9] (<https://dbaasp.org/tools?page=property-calculation>) and the Eisenberg and Weiss hydrophobicity  
83 scale[S10]. Reported properties are: Normalized Hydrophobic Moment (NHM), Normalized Hydrophobicity (NH), Net Charge (NC),  
84 Isoelectric Point (IP), Penetration Depth (PD), Tilt Angle (TA), Disordered Conformation Propensity (DCP), Linear Moment (LM),  
85 Propensity to *in vitro* Aggregation (PA), Angle Subtended by the Hydrophobic Residues (AS), Amphiphilicity Index (AI), and  
86 Propensity to PPII coil (PC).

87

| Fragment ID                                                         | NHM            | NH             | NC             | IP              | PD              | TA               | DCP             | LM             | PA                 | AS             | AI             | PC             |
|---------------------------------------------------------------------|----------------|----------------|----------------|-----------------|-----------------|------------------|-----------------|----------------|--------------------|----------------|----------------|----------------|
| CBPZ-GSK24                                                          | 0.11           | 0.02           | 4              | 10.87           | 15              | 90               | -0.19           | 0.31           | 356.51             | 40             | 2.15           | 1.13           |
| XDH-AVA32                                                           | 0.32           | -0.02          | 4              | 11.07           | 18              | 114              | 0.12            | 0.14           | 0.00               | 90             | 1.03           | 0.95           |
| LYSC-AVA39                                                          | 0.28           | 0.25           | 6              | 10.98           | 30              | 141              | -0.06           | 0.24           | 12.06              | 60             | 1.15           | 1.01           |
| ISK5-GKI32                                                          | 0.18           | 0.30           | 2              | 8.93            | 30              | 42               | -0.16           | 0.31           | 0.00               | 30             | 1.05           | 0.97           |
| CALR-GWT20                                                          | 0.10           | 0.06           | 2              | 10.43           | 24              | 159              | -0.08           | 0.33           | 0.00               | 40             | 1.50           | 0.96           |
| CO7A1-AIG15                                                         | 0.33           | -0.14          | 1              | 10.17           | 22              | 140              | 0.06            | 0.50           | 0.00               | 170            | 0.41           | 1.01           |
| TKN1-SSI27                                                          | 0.14           | 0.15           | 3              | 10.39           | 19              | 70               | -0.11           | 0.33           | 4.11               | 40             | 1.12           | 0.95           |
| A7E2T1-SPR29                                                        | 0.27           | 0.23           | 7              | 12.23           | 16              | 97               | -0.15           | 0.31           | 1.58               | 50             | 1.23           | 1.02           |
| PDB6I34D-ALQ29                                                      | 0.07           | 0.23           | 5              | 10.75           | 30              | 16               | -0.1            | 0.34           | 208.02             | 50             | 0.99           | 1.09           |
| A0A384E0N4-DLI09                                                    | 0.54           | 0.16           | -2             | 3.57            | 17              | 72               | 0.33            | 0.31           | 0.00               | 130            | 0.55           | 0.93           |
| A0A343EQH4-LAM11                                                    | 0.18           | -0.77          | 0              | 3.5             | 5               | 82               | 0.82            | 0.00           | 0.00               | 360            | 0.63           | 0.99           |
| A0A343AZS4-FMA25                                                    | 0.06           | -0.35          | -1             | 3.22            | 13              | 89               | 0.43            | 0.27           | 1043.42            | 60             | 0.46           | 0.98           |
| A0A343EQH0-NVK38                                                    | 0.10           | -0.34          | 2              | 10.38           | 13              | 148              | 0.38            | 0.42           | 892.42             | 50             | 0.58           | 1.11           |
| A0A0S2IB02-AYT38                                                    | 0.09           | -0.39          | 2              | 10.28           | 3               | 40               | 0.48            | 0.39           | 1447.14            | 90             | 0.79           | 0.99           |
| Archaic encrypted peptides<br>( <i>n</i> = 6)                       | 0.10<br>(0.18) | -0.35 (0.38)   | 1<br>(2.53)    | 6.93 (3.86)     | 13<br>(9.67)    | 77<br>(45.36)    | 0.41<br>(0.3)   | 0.33<br>(0.15) | 550.22<br>(612.11) | 75 (119.94)    | 0.61 (0.19)    | 0.99<br>(0.07) |
| Modern encrypted peptides<br>( <i>n</i> = 8)                        | 0.23<br>(0.09) | 0.11<br>(0.15) | 3.50<br>(2.07) | 10.65 (0.94)    | 20.50<br>(5.87) | 105.50<br>(39.6) | -0.10 (0.11)    | 0.31<br>(0.1)  | 0.79 (125.22)      | 45<br>(46.29)  | 1.14<br>(0.49) | 0.99<br>(0.06) |
| Previously reported encrypted peptides<br>[S11]<br>( <i>n</i> = 35) | 0.23<br>(0.15) | 0.20<br>(0.19) | 7<br>(3.34)    | 11.58<br>(0.78) | 21<br>(7.19)    | 88<br>(30.89)    | -0.17<br>(0.21) | 0.23<br>(0.05) | 0<br>(127.27)      | 60<br>(31.48)  | 1.23<br>(0.31) | 1.03<br>(0.12) |
| AMPs in the DBAASP [S9]<br>( <i>n</i> = 14,995)                     | 0.37<br>(0.24) | 0.07<br>(0.42) | 4<br>(3.18)    | 11.15<br>(2.21) | 15<br>(6.98)    | 88<br>(33.21)    | -0.05<br>(0.46) | 0.29<br>(0.11) | 0<br>(149.89)      | 110<br>(69.95) | 1.23<br>(0.91) | 0.97<br>(0.13) |

88

89

90 **Table S5 related to Fig. 2. Precursor proteins of modern and archaic encrypted peptides with antimicrobial activity.** The  
 91 precursor protein data for the archaic encrypted peptides was obtained from UniProt[S12] and NCBI Protein Databases  
 92 (<https://www.ncbi.nlm.nih.gov/protein/>). The precursor protein data for the modern encrypted peptides was obtained from the  
 93 PANTHER Classification System (<http://www.pantherdb.org/>)[S13]. PANTHER protein class is indicated by an asterisk (\*). Percent  
 94 identity shared of archaic precursor proteins with modern human proteins (% ID) and query coverage (QC) were computed by BLAST  
 95 analysis[S14], with values reported for the top modern human hits. Dashes indicate that data were unavailable.

| Classification | Precursor name                                               | Hominin                                                  | UniProt ID | NCBI ID                     | % ID (QC)     | Length | Keywords                                                                                                                                                          | Features                      | Fragment ID      | Fragment sequence                                      |
|----------------|--------------------------------------------------------------|----------------------------------------------------------|------------|-----------------------------|---------------|--------|-------------------------------------------------------------------------------------------------------------------------------------------------------------------|-------------------------------|------------------|--------------------------------------------------------|
| AEP            | Chain D, Neanderthal Glycine decarboxylase                   | <i>Homo sapiens neanderthalensis</i> (Neanderthal)       |            | gi 1777435468 pdb 6I34 D    | 99.90% (100%) | 984    | -                                                                                                                                                                 | -                             | PDB6I34D-ALQ29   | ALQLCYRHNKRR<br>KFFV<br>DPRCHPQTIADV<br>Q              |
| AEP            | Adenylosuccinate lyase (ASL) (EC 4.3.2.2) (Adenylosuccinase) | <i>Homo sapiens neanderthalensis</i> (Neanderthal)       | A0A384E0N4 | gi 1393955578 pdb 5NXA H    | 99.59% (100%) | 487    | 3D-structure; Coiled coil; Lyase; Purine biosynthesis                                                                                                             | Coiled coil (1); Domain (1)   | A0A384E0N4-DLI09 | DLIERIQAD                                              |
| AEP            | ATP synthase subunit a                                       | <i>Homo sapiens neanderthalensis</i> (Neanderthal)       | A0A343EQH4 | gi 1214786277 gb ASK06270.1 | 99.56% (100%) | 226    | ATP synthesis; CF(0); Hydrogen ion transport; Ion transport; Membrane; Mitochondrion; Mitochondrion inner membrane; Transmembrane; Transmembrane helix; Transport | Transmembrane (6)             | A0A343EQH4-LAM11 | LAMVIPLWAGA                                            |
| AEP            | NADH-ubiquinone oxidoreductase chain 1 (EC 7.1.1.2)          | <i>Homo sapiens</i> subsp. 'Denisova' (Denisova hominin) | A0A343AZS4 | gi 1141958635 gb AQD17584.1 | 99.06% (100%) | 318    | Membrane; Mitochondrion; NAD; Transmembrane; Transmembrane helix; Transport; Ubiquinone                                                                           | Transmembrane (8)             | A0A343AZS4-FMA25 | FMAEYTNIMMN<br>TLTTT<br>IFLGTTYN                       |
| AEP            | NADH-ubiquinone oxidoreductase chain 2 (EC 7.1.1.2)          | <i>Homo sapiens neanderthalensis</i> (Neanderthal)       | A0A343EQH0 | gi 1578894740 gb ASK06266.2 | 99.38% (92%)  | 347    | Electron transport; Membrane; Mitochondrion; Mitochondrion inner membrane; NAD; Respiratory chain; Translocase; Transmembrane; Transmembrane                      | Domain (2); Transmembrane (8) | A0A343EQH0-NVK38 | NVKMKWQFEHT<br>KTPP<br>FLPTLITLTLTLLP<br>ISPF<br>MLMIL |

|     |                                                                                                                                       |                                                          |             |                                   |               |     |                                                                                                                                                                                                                         |                                |                  |                                             |
|-----|---------------------------------------------------------------------------------------------------------------------------------------|----------------------------------------------------------|-------------|-----------------------------------|---------------|-----|-------------------------------------------------------------------------------------------------------------------------------------------------------------------------------------------------------------------------|--------------------------------|------------------|---------------------------------------------|
|     |                                                                                                                                       |                                                          |             |                                   |               |     | helix; Transport; Ubiquinone                                                                                                                                                                                            |                                |                  |                                             |
| AEP | Cytochrome c oxidase subunit 1 (EC 7.1.1.9)                                                                                           | <i>Homo sapiens</i> subsp. 'Denisova' (Denisova hominin) | A0A0S2IB02  | gi 1141958637 gb AQD17586.1       | 99.42% (100%) | 513 | Calcium; Copper; Electron transport; Heme; Iron; Magnesium; Membrane; Metal-binding; Mitochondrion; Mitochondrion inner membrane; Respiratory chain; Sodium; Translocase; Transmembrane; Transmembrane helix; Transport | Domain (1); Transmembrane (12) | A0A0S2IB02-AYT38 | AYTTWNILSSAGS FIS LTAVMLMIFMIW EAF ASKRKVL  |
| MEP | Calreticulin                                                                                                                          | <i>Homo sapiens sapiens</i>                              | CALR_HUMAN  | HUMAN HGNC=1455 UniProtKB=P27797  | -             | -   | Chaperone*                                                                                                                                                                                                              | -                              | CALR-GWT20       | GWTSRWIESKHK SDFGKFLV                       |
| MEP | Xanthine dehydrogenase/oxidase                                                                                                        | <i>Homo sapiens sapiens</i>                              | XDH_HUMAN   | HUMAN HGNC=12805 UniProtKB=P47989 | -             | -   | Oxidoreductase*                                                                                                                                                                                                         | -                              | XDH-AVA32        | AVAKLPAQKTEV FRGVLE QLRWFAGKQVKSV           |
| MEP | Serine protease inhibitor Kazal-type 5                                                                                                | <i>Homo sapiens sapiens</i>                              | ISK5_HUMAN  | HUMAN HGNC=15464 UniProtKB=Q9NQ38 | -             | -   | Protease inhibitor*                                                                                                                                                                                                     | -                              | ISK5-GKI32       | GKIHGNTCSMCE AFFQQE AKEKERAEPRAKVK          |
| MEP | Carboxypeptidase Z                                                                                                                    | <i>Homo sapiens sapiens</i>                              | CBPZ_HUMAN  | HUMAN HGNC=2333 UniProtKB=Q66K79  | -             | -   | Protease*                                                                                                                                                                                                               | -                              | CBPZ-GSK24       | GSKPWWSYFTS LST HRPRWLLKY                   |
| MEP | Lysozyme C                                                                                                                            | <i>Homo sapiens sapiens</i>                              | LYSC_HUMAN  | HUMAN HGNC=6740 UniProtKB=P61626  | -             | -   | -                                                                                                                                                                                                                       | -                              | LYSC-AVA39       | AVACAKRVVVRDP QGIRA WVAWRNRCQNR DVRQY VQCGV |
| MEP | Collagen alpha-1(VII) chain (Long-chain collagen) (LC collagen)                                                                       | <i>Homo sapiens sapiens</i>                              | CO7A1_HUMAN | HUMAN HGNC=2214 UniProtKB=Q02388  | -             | -   | Extracellular matrix -structural -protein*                                                                                                                                                                              | -                              | CO7A1-AIG15      | AIGPKGDRGFPGP LG                            |
| MEP | Protachykinin-1 (PPT) [Cleaved into: Substance P; Neurokinin A (NKA) (Neuromedin L) (Substance K); Neuropeptide K (NPK); Neuropeptide | <i>Homo sapiens sapiens</i>                              | TKN1_HUMAN  | HUMAN HGNC=11517 UniProtKB=P20366 | -             | -   | -                                                                                                                                                                                                                       | -                              | TKN1-SSI27       | SSIEKQVALLKAL YGHGQIS HKRHKTD               |



|     |                                     |                             |              |  |   |   |   |   |              |                                       |
|-----|-------------------------------------|-----------------------------|--------------|--|---|---|---|---|--------------|---------------------------------------|
|     | gamma; C-terminal-flanking peptide] |                             |              |  |   |   |   |   |              |                                       |
| MEP | Uncharacterized protein (Fragment)  | <i>Homo sapiens sapiens</i> | A7E2T1_HUMAN |  | - | - | - | - | A7E2T1-SPR29 | SPRYHTVGRAAG<br>LLMGLRR<br>SPYLWRRALR |

96

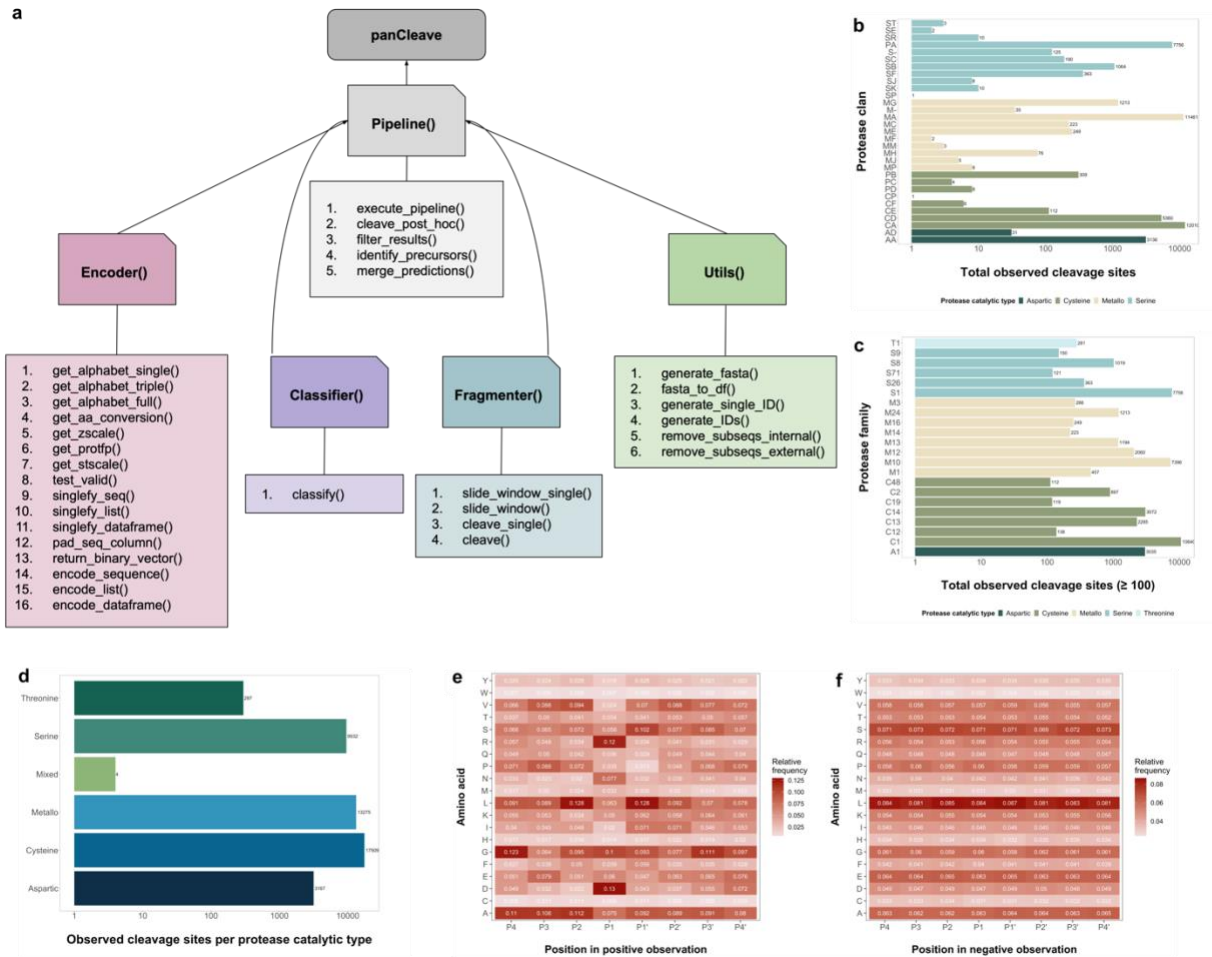

99  
 100 **Fig. S1 related to Fig. 2. Domain model for the panCleave pipeline in Python, representation**  
 101 **of proteases among substrate cleavage sites in panCleave training and testing data ( $n =$**   
 102 **24,817), and amino acid frequencies by residue position for all training and testing data. (a)**  
 103 **The class *Pipeline* is dependent on classes *Encoder*, *Classifier*, *Fragmenter*, and *Utils*. Each class**  
 104 **features the methods enumerated here. Plots represent total cleavage sites arranged by (b) protease**  
 105 **clan, (c) family, and (d) catalytic type, as defined by the MEROPS Peptidase Database[S1]. Amino**  
 106 **acid relative frequencies are reported by residue position in (e) 8-residue positive observations ( $n =$**   
 107 **24,817) and (f) 8-residue negative observations ( $n = 24,817$ ). Cleavage takes place between**  
 108 **positions P1 and P1' in positive observations.**

109  
 110  
 111  
 112  
 113  
 114  
 115  
 116  
 117

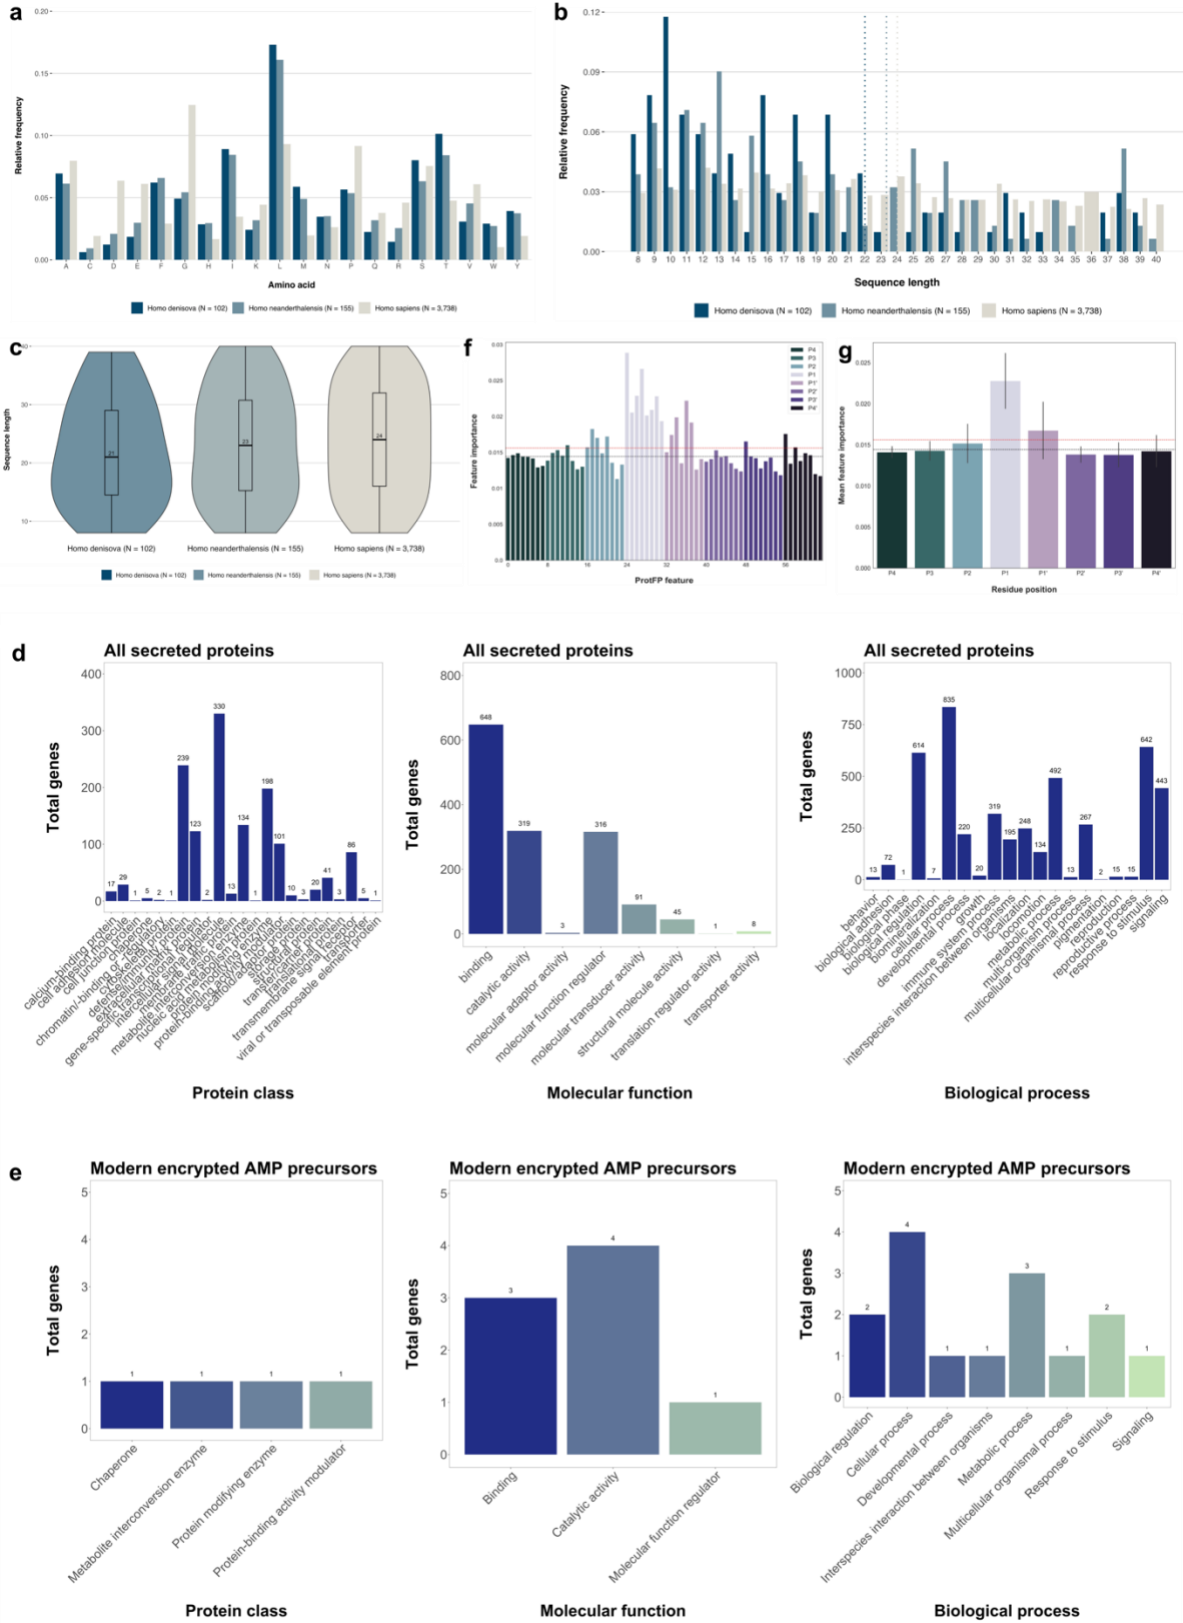

119 **Fig. S2 related to Fig. 2. Relative frequencies of amino acids and fragment length for all**  
120 **unique panCleave fragments per taxon; origin, molecular functions, and biological processes**  
121 **represented by all queried human secreted proteins and by precursors of modern encrypted**  
122 **peptides discovered in the present work, and panCleave feature importance based on mean**  
123 **decrease in impurity. (a)** Relative amino acid frequency for all generated fragments, not just those  
124 filtered for synthesis or with demonstrated activity. **(b)** Relative frequency of sequence length of  
125 all secreted proteins available in UniProt[S12]. **(c)** Sequence length distribution of EPs across the  
126 different hominids. Plots shown in **(a)**, **(b)**, and **(c)** include all generated fragments, not just those  
127 filtered for synthesis or with demonstrated activity. Protein classes, molecular functions, and  
128 biological processes represented by **(d)** all queried human secreted proteins available in  
129 UniProt[S12] and **(e)** by precursors of modern encrypted peptides discovered in the present work.  
130 Data were obtained from PANTHER (<http://www.pantherdb.org/>)[S27][S13]. **(f and g)** Features  
131 importance were calculated by in-built functions provided by scikit-learn for random forests. Panel  
132 **(f)** plots the importance of each individual ProtFP feature. Each of the eight residues in a given  
133 P4:P4' cleavage flanking site is encoded by eight floating point features, as computed under the  
134 ProtFP encoding scheme. Thus, each input sequence is represented by 64 features. Panel **(g)** plots  
135 the average importance of each residue position, with error bars signifying standard deviation.  
136 Mean and median importance across all ProtFP features are visualized as red and black dashed  
137 lines, respectively.  
138  
139

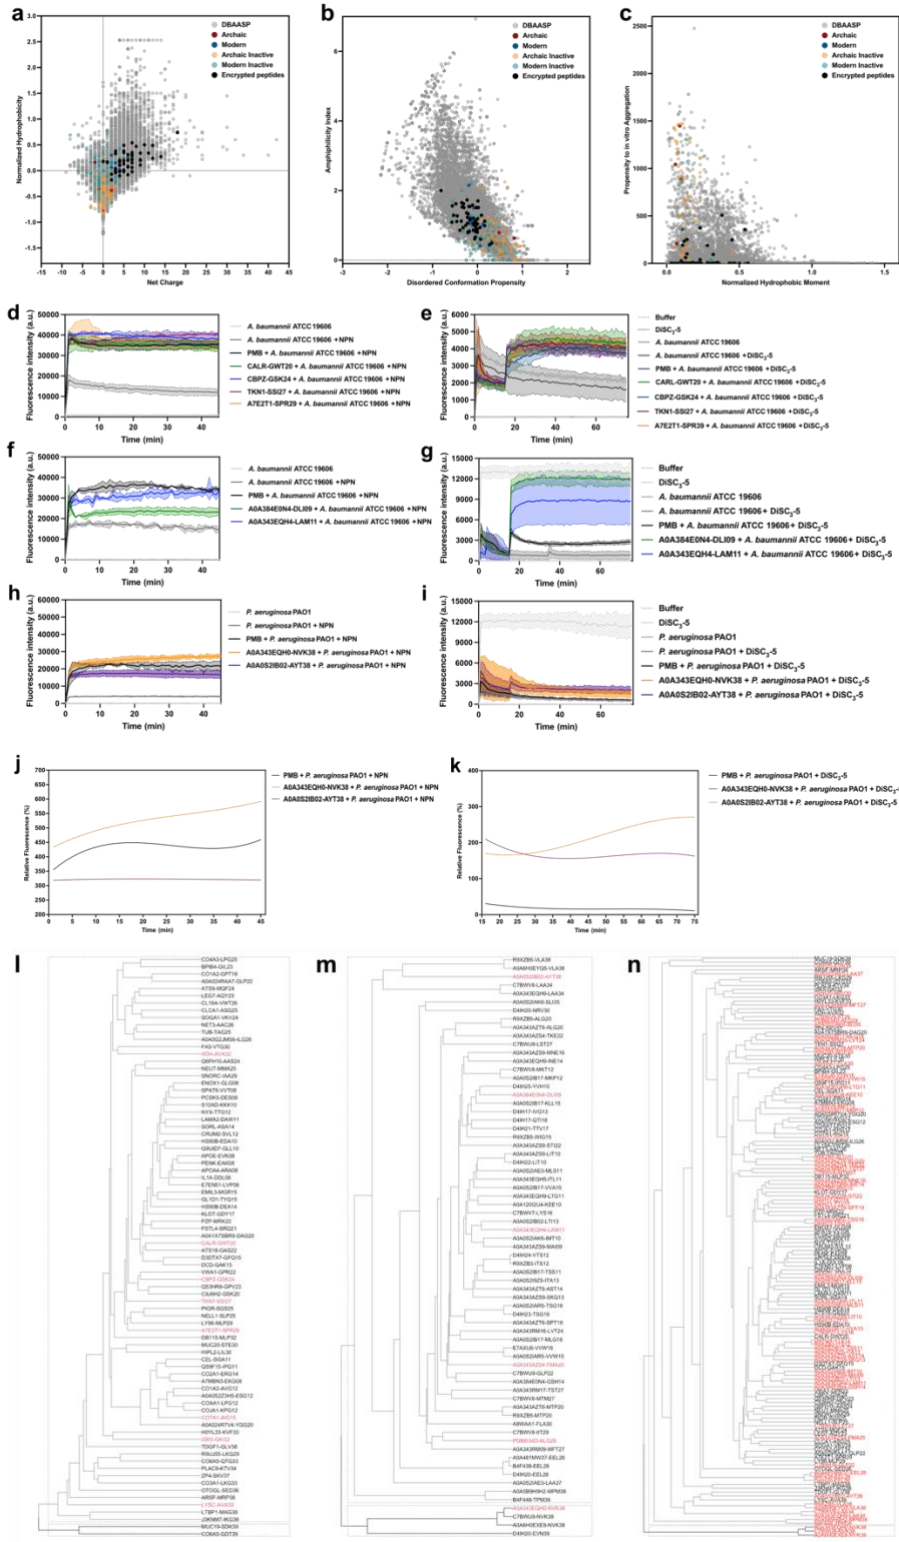

140  
 141 **Fig. S3 related to STAR Methods and Fig. 3. Physicochemical features, mechanism of action,**  
 142 **and clustering according to antimicrobial activity of encrypted peptides identified by**  
 143 **panCleave. (a) Net charge vs. hydrophobicity normalized according to the length of the peptide.**

144 Net charge directly influences the initial electrostatic interactions between the peptide and  
145 negatively charged bacterial membranes, and hydrophobicity directly influences the interactions  
146 of the peptide with lipids in the membrane bilayers. **(b)** Amphiphilicity index vs. disordered  
147 conformation propensity; both properties closely correlated with AMP mechanism of action. **(c)**  
148 Propensity to aggregate *in vitro* vs. hydrophobic moment normalized by peptide length; propensity  
149 to aggregate correlates with AMP toxicity. All properties were calculated using the DBAASP  
150 property calculator tool[S9]. AEPs and MEPs were compared to known AMPs and other  
151 previously described encrypted peptides from the human proteome. Panels **(d)** to **(i)**:  
152 Permeabilization assays with the fluorescent probe 1-(N-phenylamino)naphthalene (NPN); effect  
153 of **(d)** modern encrypted peptides and **(e)** archaic encrypted peptides on against *A. baumannii* cells,  
154 and **(f)** archaic encrypted peptides on *P. aeruginosa* PA01 cells. Depolarization assays with the  
155 hydrophobic probe 3,3'-dipropylthiadicarbocyanine iodide [DiSC<sub>3</sub>-(5)]; effects of **(g)** modern  
156 encrypted peptides and **(h)** archaic encrypted peptides on *A. baumannii* cells, and **(i)** archaic  
157 encrypted peptides on *P. aeruginosa* PA01 cells. All panels show the raw fluorescence intensity  
158 data obtained in the experiments. Panels **(j)** and **(k)**: Relative fluorescence values of archaic  
159 encrypted peptides compared to the untreated control. **(j)** Permeabilization of the outer membrane  
160 using the probe 1-(N-phenylamino)naphthalene (NPN) and **(k)** depolarization of the cytoplasmic  
161 membrane indicated by the probe 3,3'-dipropylthiadicarbocyanine iodide [DiSC<sub>3</sub>-(5)] of *P.*  
162 *aeruginosa* PA01 cells. Both peptides depolarized membranes more strongly than polymyxin B  
163 (control). A0A343EQH0-NVK38 permeabilized outer membranes more strongly than PMB or  
164 A0A0S2IB02-AYT38. Archaic **(l)** and modern **(m)** encrypted peptides did not cluster neatly  
165 according to the presence (red labels) or absence (black labels) of antimicrobial activity. Likewise,  
166 hierarchical *k*-means clustering of archaic (red labels) and modern (black labels) in panel **(n)** did  
167 not reveal clean separation of archaic and modern fragments. Values for *k* (*i.e.*, total clusters; *k* =  
168 2 for all subfigures) were selected based on joint evaluation of gap statistic, average silhouette  
169 score, and within-cluster sum of squares methods. Data were represented using the ProtFP  
170 encoding method[S15] and scaled prior to clustering method and scaled prior to clustering.

171 **References**

- 172 S1. Rawlings, N. D., Barrett, A. J., Thomas, P. D., Huang, X., Bateman, A., & Finn, R. D.  
173 (2018). The MEROPS database of proteolytic enzymes, their substrates and inhibitors in  
174 2017 and a comparison with peptidases in the PANTHER database. *Nucleic Acids*  
175 *Research*, 46(D1), D624–D632. <https://doi.org/10.1093/nar/gkx1134>
- 176 S2. Li, F., Chen, J., Leier, A., Marquez-Lago, T., Liu, Q., Wang, Y., ... Song, J. (2020).  
177 DeepCleave: a deep learning predictor for caspase and matrix metalloprotease substrates  
178 and cleavage sites. *Bioinformatics*, 36(4), 1057–1065.  
179 <https://doi.org/10.1093/bioinformatics/btz721>
- 180 S3. Wang, M., Zhao, X.-M., Tan, H., Akutsu, T., Whisstock, J. C., & Song, J. (2014).  
181 Cascleave 2.0, a new approach for predicting caspase and granzyme cleavage targets.  
182 *Bioinformatics*, 30(1), 71–80. <https://doi.org/10.1093/bioinformatics/btt603>
- 183 S4. Ayyash, M., Tamimi, H., & Ashhab, Y. (2012). Developing a powerful In Silico tool for  
184 the discovery of novel caspase-3 substrates: a preliminary screening of the human  
185 proteome. *BMC Bioinformatics*, 13(1), 14. <https://doi.org/10.1186/1471-2105-13-14>
- 186 S5. Kumar, S., Ratnikov, B. I., Kazanov, M. D., Smith, J. W., & Cieplak, P. (2015).  
187 CleavPredict: A Platform for Reasoning about Matrix Metalloproteinases Proteolytic  
188 Events. *PLOS ONE*, 10(5), e0127877. <https://doi.org/10.1371/journal.pone.0127877>
- 189 S6. Fu, S., Imai, K., Sawasaki, T., & Tomii, K. (2014). ScreenCap3: Improving prediction of  
190 caspase-3 cleavage sites using experimentally verified noncleavage sites. *PROTEOMICS*,  
191 14(17–18), 2042–2046. <https://doi.org/10.1002/pmic.201400002>
- 192 S7. Verspurten, J., Gevaert, K., Declercq, W., & Vandenabeele, P. (2009). SitePredicting the  
193 cleavage of proteinase substrates. *Trends in Biochemical Sciences*, 34(7), 319–323.  
194 <https://doi.org/10.1016/j.tibs.2009.04.001>
- 195 S8. Song, J., Li, F., Leier, A., Marquez-Lago, T. T., Akutsu, T., Haffari, G., ... Pike, R. N.  
196 (2018). PROSPERous: high-throughput prediction of substrate cleavage sites for 90  
197 proteases with improved accuracy. *Bioinformatics*, 34(4), 684–687.  
198 <https://doi.org/10.1093/bioinformatics/btx670>
- 199 S9. Pirtskhalava, M., Armstrong, A. A., Grigolava, M., Chubinidze, M., Alimbarashvili, E.,  
200 Vishnepolsky, B., ... Tartakovsky, M. (2021). DBAASP v3: database of  
201 antimicrobial/cytotoxic activity and structure of peptides as a resource for development of  
202 new therapeutics. *Nucleic Acids Research*, 49(D1), D288–D297.  
203 <https://doi.org/10.1093/nar/gkaa991>
- 204 S10. Eisenberg, D., Schwarz, E., Komaromy, M., & Wall, R. (1984). Analysis of membrane  
205 and surface protein sequences with the hydrophobic moment plot. *Journal of Molecular*  
206 *Biology*, 179(1), 125–142. [https://doi.org/https://doi.org/10.1016/0022-2836\(84\)90309-7](https://doi.org/https://doi.org/10.1016/0022-2836(84)90309-7)
- 207 S11. Torres, M. D. T., Melo, M. C. R., Flowers, L., Crescenzi, O., Notomista, E., & de la  
208 Fuente-Nunez, C. (2022). Mining for encrypted peptide antibiotics in the human  
209 proteome. *Nature Biomedical Engineering*, 6(1), 67–75. <https://doi.org/10.1038/s41551-021-00801-1>
- 210
- 211 S12. The UniProt Consortium. (2019). UniProt: a worldwide hub of protein knowledge.  
212 *Nucleic Acids Research*, 47(D1), D506–D515. <https://doi.org/10.1093/nar/gky1049>
- 213 S13. Mi, H., Ebert, D., Muruganujan, A., Mills, C., Albou, L.-P., Mushayamaha, T., &  
214 Thomas, P. D. (2021). PANTHER version 16: a revised family classification, tree-based  
215 classification tool, enhancer regions and extensive API. *Nucleic Acids Research*, 49(D1),  
216 D394–D403. <https://doi.org/10.1093/nar/gkaa1106>

- 217 S14. Altschul, S. (1997). Gapped BLAST and PSI-BLAST: a new generation of protein  
218 database search programs. *Nucleic Acids Research*, 25(17), 3389–3402.  
219 <https://doi.org/10.1093/nar/25.17.3389>
- 220 S15. van Westen, G. J., Swier, R. F., Cortes-Ciriano, I., Wegner, J. K., Overington, J. P.,  
221 IJzerman, A. P., ... Bender, A. (2013). Benchmarking of protein descriptor sets in  
222 proteochemometric modeling (part 2): modeling performance of 13 amino acid descriptor  
223 sets. *Journal of Cheminformatics*, 5(1), 42. <https://doi.org/10.1186/1758-2946-5-42>  
224
